# Supplementary material for: Photodynamic treatment of Staphylococcus aureus with non-iron hemin analogs in the presence of hydrogen peroxide
Source: Royal Society of Chemistry journal article supplement (doi:10.1039/d4md00148f), 2024-01-01
Supplement: d4md00148f1.pdf [file d4md00148f1.pdf]

## Photodynamic treatment of *Staphylococcus aureus* with non-iron hemin analogs in the presence of hydrogen peroxide

|                                                                                                                 |     |
|-----------------------------------------------------------------------------------------------------------------|-----|
| Synthesis of M-PpIX derivatives .....                                                                           | S-1 |
| One- and two-dimensional plots of representative flow cytometry data (Fig. S1).....                             | S-2 |
| Flow cytometry data for Ga-PpIX uptake by fixed <i>S. aureus</i> (Fig. S2) .....                                | S-3 |
| Flow cytometry data for Ga-PpIX uptake by <i>aureus</i> exposed to H <sub>2</sub> O <sub>2</sub> (Fig. S3)..... | S-3 |
| EPR data for estimating $\Phi_{SO}$ of M-PpIX with 405-nm excitation (Fig. S4).....                             | S-4 |

**Synthesis of M-PpIX derivatives:** Al-, Ga-, and In-PpIX chloride were prepared from protoporphyrin IX (PpIX) using previously published protocols,<sup>24,63</sup> with minor modifications in the case of Al-PpIX.<sup>64,65</sup>

In a typical reaction, PpIX dimethyl ester was prepared by dissolving PpIX (500 mg) in a 5% H<sub>2</sub>SO<sub>4</sub> solution in methanol (11 mL) and stirred for 18 h at room temperature with protection from light, then neutralized with saturated aqueous NH<sub>4</sub>Cl and extracted three times with CH<sub>2</sub>Cl<sub>2</sub>. The organic layer was washed with water and dried over Na<sub>2</sub>SO<sub>4</sub>, then concentrated under vacuum to yield a black solid in 90% yield. Al-PpIX was prepared by dissolving PpIX dimethyl ester (100 mg) in distilled pyridine (4 mL) in a glass microwave tube followed by addition of excess AlCl<sub>3</sub> (250 mg). The reaction mixture was heated to 140 °C under microwave conditions (45 W) for 60 min. Al-PpIX dimethyl ester was extracted by removing the supernatant, washing the residual solid with pyridine (3 × 3 mL), and concentrating the extract to dryness. Saponification to Al-PpIX was achieved by dissolving the crude dimethyl ester in 10 mL of 1,4-dioxane and 1 mL of 2 wt% NaOH and heating for 3 h under reflux conditions. The mixture was cooled to room temperature, neutralized with 1 M HCl then adjusted to pH 4.5, and concentrated to dryness. The solid containing Al-PpIX was suspended in methanol, filtered, then extracted three times with chloroform. The extracts were concentrated and dried under vacuum to yield Al-PpIX as a dark-red solid in 20% yield.

**Flow cytometry data**

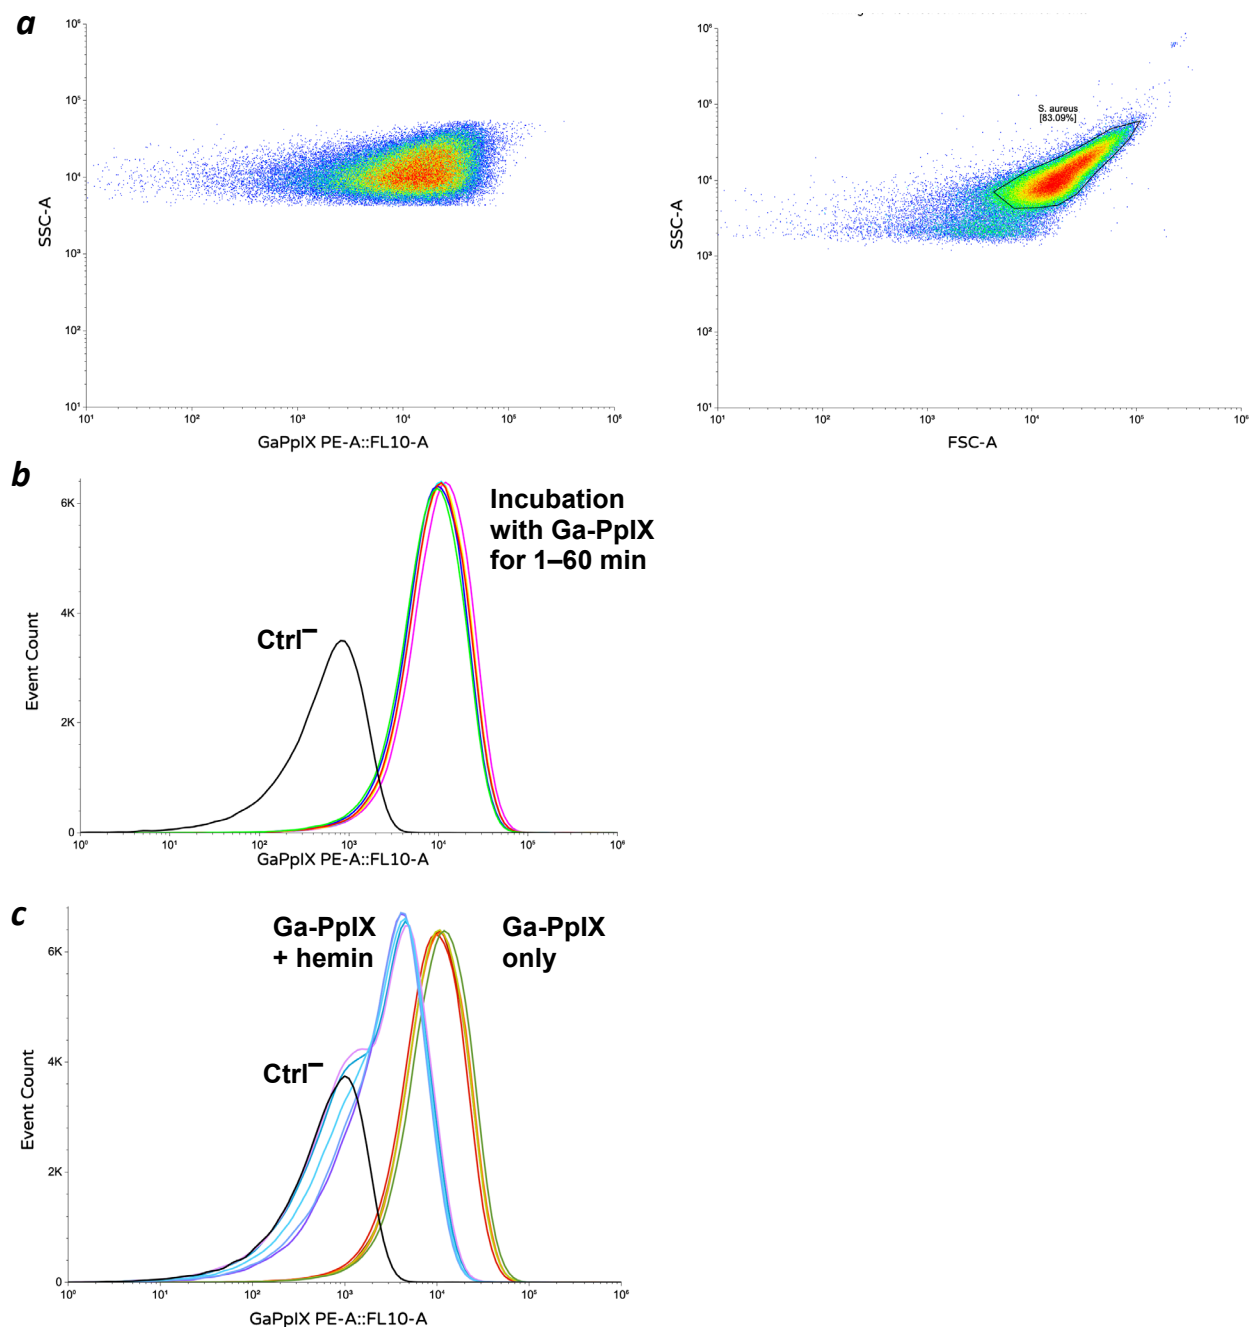

**Figure S1.** (a) Fluorescence and gated 2D contour plots of *S. aureus* (PCI 1203) treated with 10  $\mu$ M Ga-PpIX for 60 min. Cultures were fixed with 4% paraformaldehyde then subjected immediately to FC analysis. (b) 1D FC plot with log fluorescence intensity (x-axis); peak values replotted with log values (y-axis) in Fig. 3a. (c) 1D FC plot with log fluorescent intensity (x-axis) of *S. aureus* incubated with 10  $\mu$ M Ga-PpIX plus 10  $\mu$ M hemin for 1–60 min; peak values replotted with linear values (y-axis) in Fig. 3b.

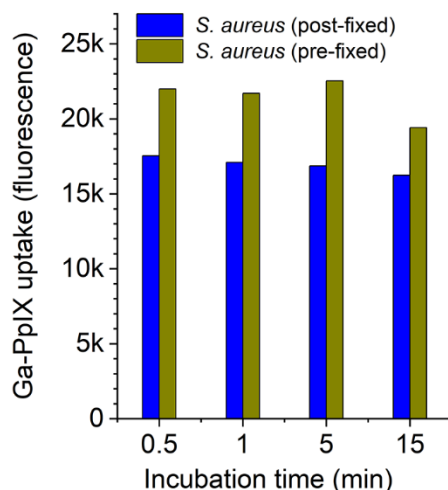

**Figure S2.** Histogram of FC data for *S. aureus* treated with 10  $\mu$ M Ga-PpIX for up to 15 min with post-fixing (blue; cf. Figures 3 and S1) versus pre-fixed *S. aureus* treated under identical conditions (green).

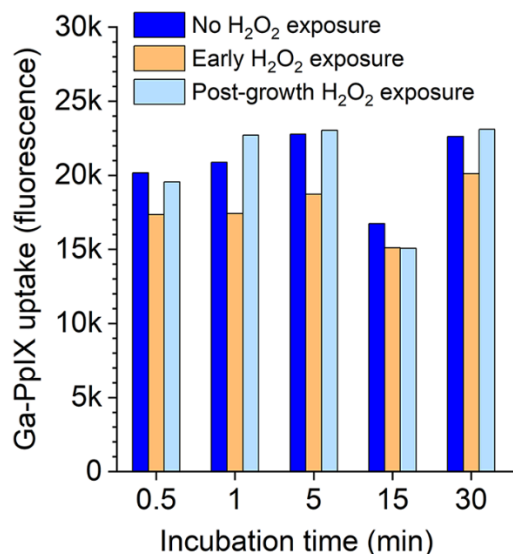

**Figure S3.** Histogram of FC data for *S. aureus* exposed to 1 mM H<sub>2</sub>O<sub>2</sub> for 4 h during log-growth phase (early H<sub>2</sub>O<sub>2</sub> exposure; orange) or 3 h during post-growth phase (late H<sub>2</sub>O<sub>2</sub> exposure; light blue) followed by treatment with 10  $\mu$ M Ga-PpIX for up to 30 min. Cultures were fixed with 4% paraformaldehyde then subjected immediately to FC analysis. *S. aureus* cultured in the absence of H<sub>2</sub>O<sub>2</sub> were included as a control (no H<sub>2</sub>O<sub>2</sub> exposure; dark blue).

**EPR data**

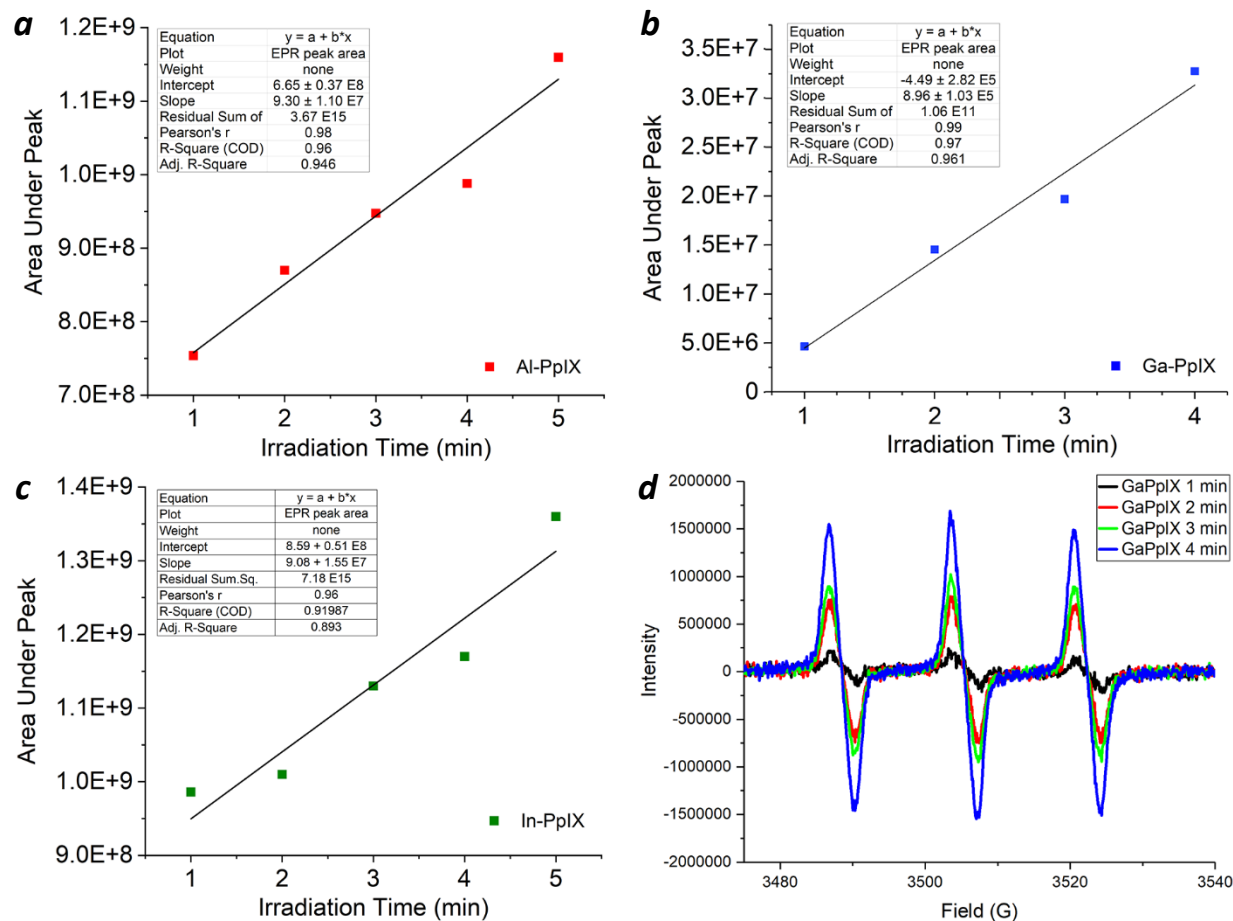

**Figure S4.** (a–c) Standard curves based on peak area integration of EPR signals from 4-hydroxy-TEMPO produced by M-PpIX as a measure of  $^1\text{O}_2$  generation: (a) M = Al; (b) M = Ga, (c) M = In. Rates of EPR signal increase were compared against those generated by TMPyP ( $\Phi_{\text{SO}} = 0.75$ ) to determine SOQY. (d) EPR signals of 4-hydroxy-TEMPO produced by Ga-PpIX after 1–4 min irradiation at 405 nm, using the method reported in Ref. 66. EPR data for Figures (b) and (d) originally reported in Ref. 24.
